# Supplementary material for: Discovery and Genomic Characterization of a 382-Nucleotide Deletion in ORF7b and ORF8 during the Early Evolution of SARS-CoV-2
Source: PubMed Central journal article supplement (PMC7374062; doi:10.1128/mbio.01610-20), 2020-07-21
Supplement: mBio.01610-20-sf001.pdf [file mBio.01610-20-sf001.pdf]

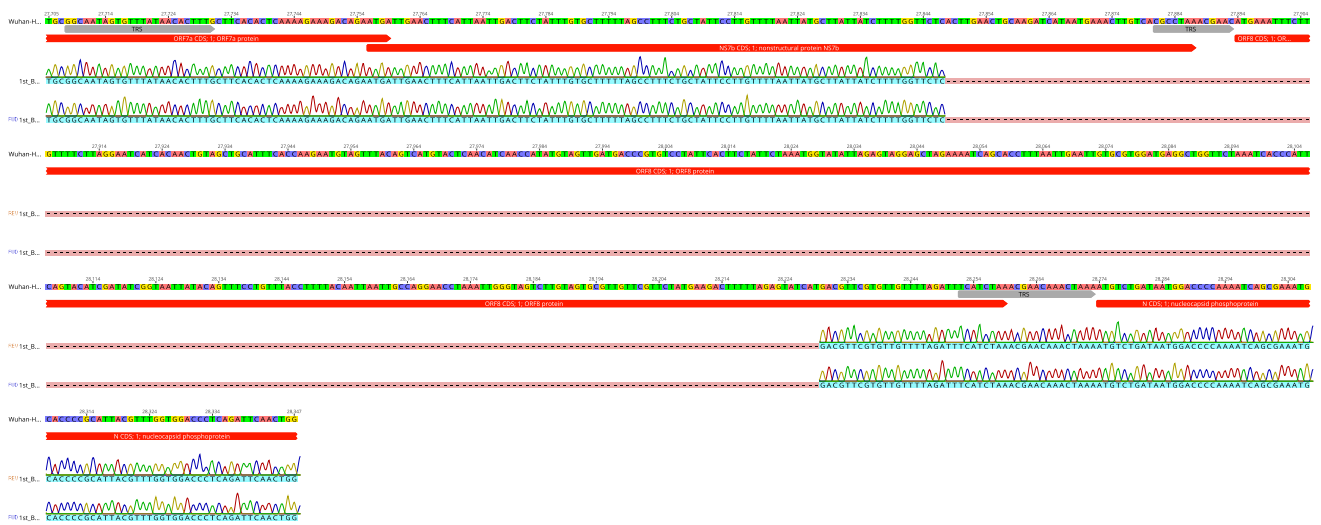

**Fig. S1.** Sanger sequences of hCoV-19/Singapore/12/2020  $\Delta$ 382 mapped to Wuhan-Hu-1 showing the position of the 382-nt deletion in the ORF7b and ORF8 regions of the SARS-CoV-2 genome.
