# Supplementary material for: Discovery and Genomic Characterization of a 382-Nucleotide Deletion in ORF7b and ORF8 during the Early Evolution of SARS-CoV-2
Source: PubMed Central journal article supplement (PMC7374062; doi:10.1128/mbio.01610-20), 2020-07-21
Supplement: mBio.01610-20-sf002.pdf [file mBio.01610-20-sf002.pdf]

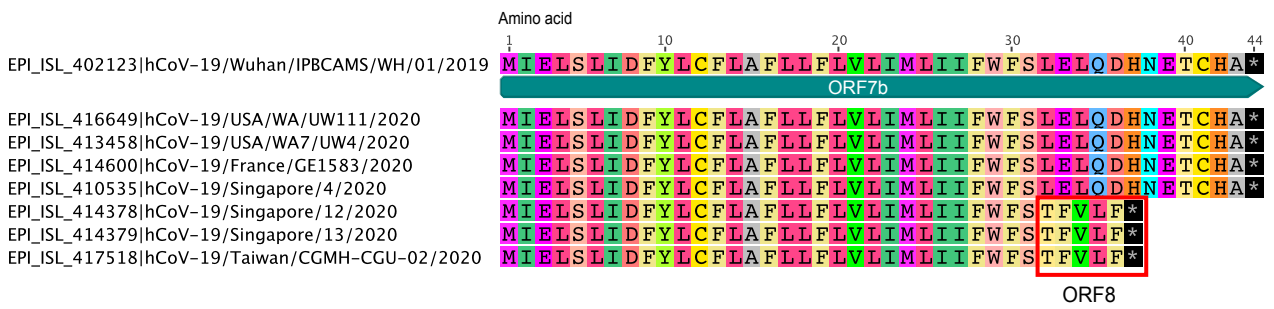

**Fig. S2.** Amino acid sequences of the ORF7b region in SARS-CoV-2 and SARS-CoV-2  $\Delta$ 382. Truncated ORF7b is observed as a result of the deleted C terminus of ORF7b in SARS-CoV-2  $\Delta$ 382.
