# Supplementary material for: Discovery and Genomic Characterization of a 382-Nucleotide Deletion in ORF7b and ORF8 during the Early Evolution of SARS-CoV-2
Source: PubMed Central journal article supplement (PMC7374062; doi:10.1128/mbio.01610-20), 2020-07-21
Supplement: mBio.01610-20-sf004.pdf [file mBio.01610-20-sf004.pdf]

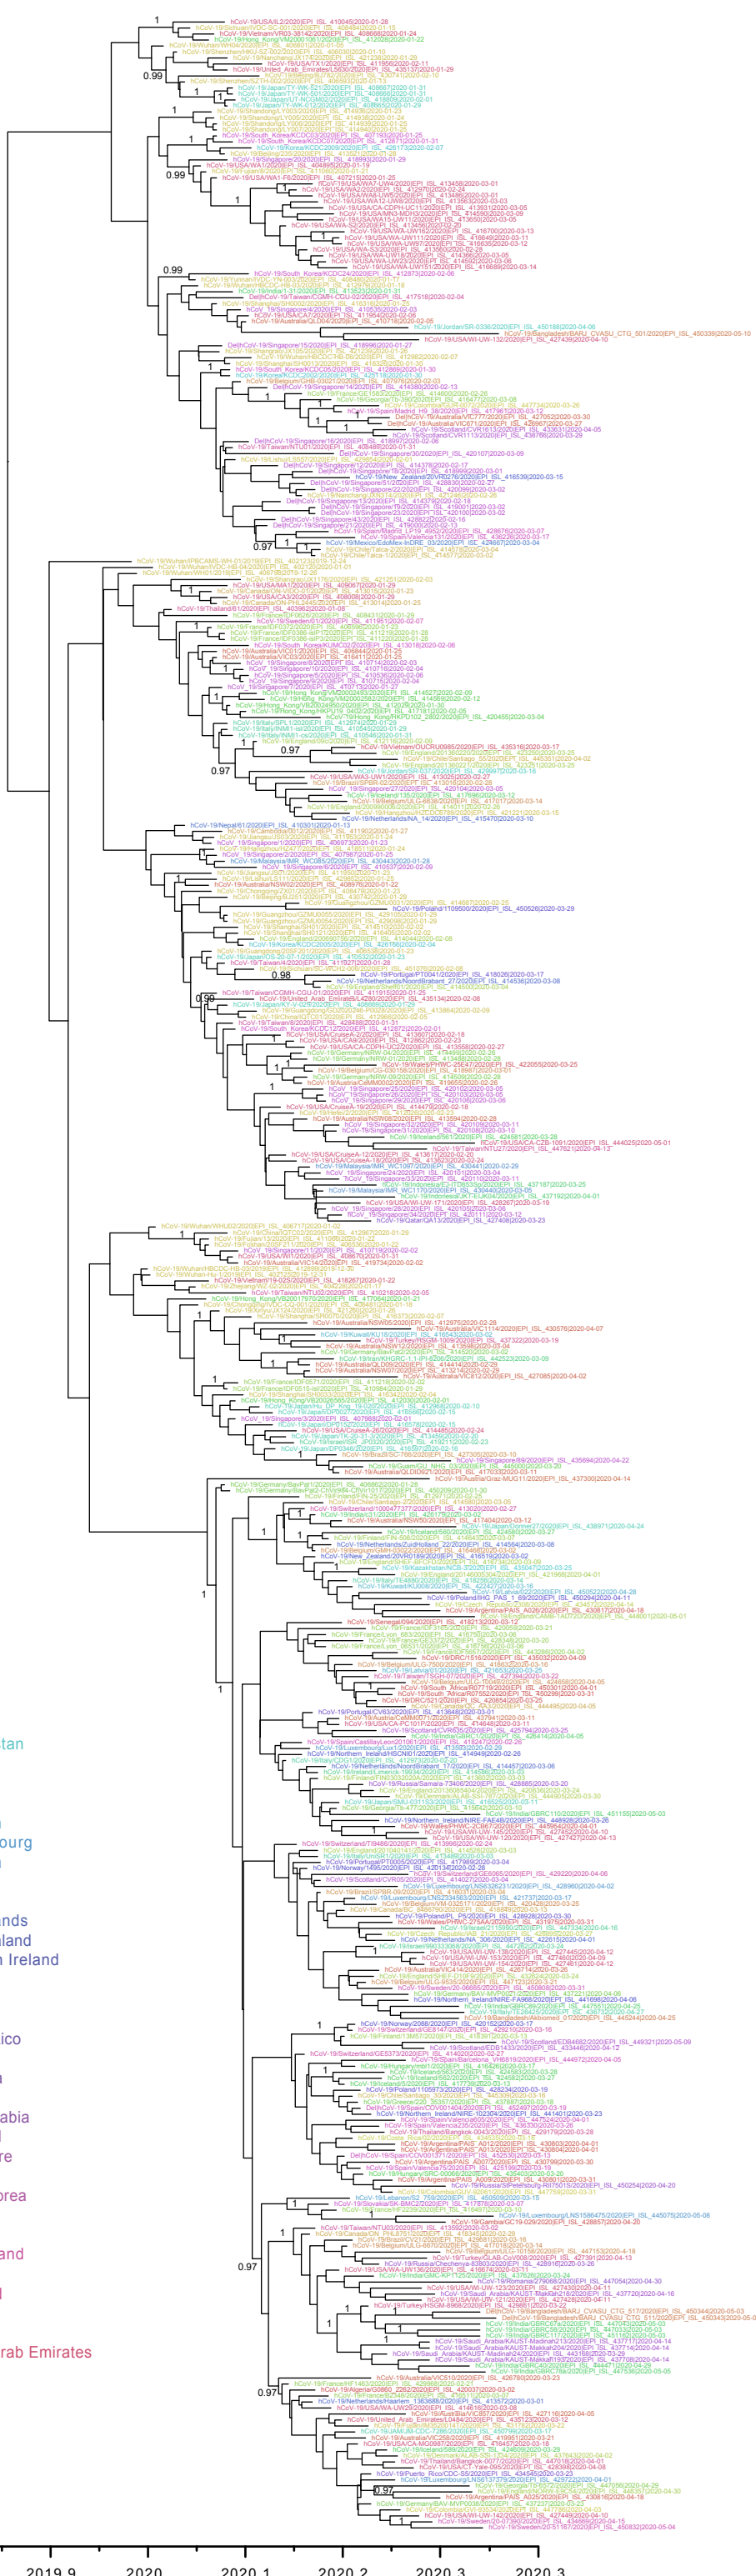

### Location

- Africa
- Argentina
- Australia
- Austria
- Bangladesh
- Belgium
- Brazil
- Cambodia
- Canada
- Chile
- China
- Colombia
- Costa\_Rica
- Czech\_Republic
- Denmark
- England
- Finland
- France
- Georgia
- Germany
- Greece
- Guam
- Hong\_Kong
- Hungary
- Iceland
- India
- Indonesia
- Iran
- Ireland
- Israel
- Italy
- Jamaica
- Japan
- Jordan
- Kazakhstan
- Korea
- Kuwait
- Latvia
- Lebanon
- Luxembourg
- Malaysia
- Mexico
- Nepal
- Netherlands
- New\_Zealand
- Northern\_Ireland
- Norway
- Poland
- Portugal
- Puerto\_Rico
- Qatar
- Romania
- Russia
- Saudi\_Arabia
- Scotland
- Singapore
- Slovakia
- South\_Korea
- Spain
- Sweden
- Switzerland
- Taiwan
- Thailand
- Turkey
- USA
- United\_Arab\_Emirates
- Vietnam
- Wales

**Fig. S4.** Evolutionary relationships of human SARS-CoV-2 and SARS-CoV-2 Δ382. Temporal phylogeny of 419 complete genomes inferred using an uncorrelated lognormal relaxed clock model in BEAST. Coloured virus names represent different geographic locations. Bayesian posterior probabilities of  $\geq 0.95$  are indicated at nodes. Scale bar represents time in years.
