# Supplementary material for: Discovery and Genomic Characterization of a 382-Nucleotide Deletion in ORF7b and ORF8 during the Early Evolution of SARS-CoV-2
Source: PubMed Central journal article supplement (PMC7374062; doi:10.1128/mbio.01610-20), 2020-07-21
Supplement: mBio.01610-20-st005.pdf [file mBio.01610-20-st005.pdf]

**Table S5.** Viruses included in phylogenetic analyses.

| Accession number | Virus isolate                      | Collection date | Note                         |
|------------------|------------------------------------|-----------------|------------------------------|
| EPI_ISL_407987   | hCoV_19/Singapore/2/2020           | 2020-01-25      | Wild type (this study)       |
| EPI_ISL_407988   | hCoV_19/Singapore/3/2020           | 2020-02-01      | Wild type (this study)       |
| EPI_ISL_410535   | hCoV_19/Singapore/4/2020           | 2020-02-03      | Wild type (this study)       |
| EPI_ISL_410536   | hCoV-19/Singapore/5/2020           | 2020-02-06      | Wild type (this study)       |
| EPI_ISL_410537   | hCoV_19/Singapore/6/2020           | 2020-02-09      | Wild type (this study)       |
| EPI_ISL_414378   | hCoV-19/Singapore/12/2020          | 2020-02-17      | 382-nt deletion (this study) |
| EPI_ISL_414379   | hCoV-19/Singapore/13/2020          | 2020-02-18      | 382-nt deletion (this study) |
| EPI_ISL_414380   | hCoV-19/Singapore/14/2020          | 2020-02-13      | 382-nt deletion (this study) |
| EPI_ISL_420099   | hCoV-19/Singapore/22/2020          | 2020-03-02      | 382-nt deletion (this study) |
| EPI_ISL_420100   | hCoV-19/Singapore/23/2020          | 2020-03-02      | 382-nt deletion (this study) |
| EPI_ISL_420101   | hCoV_19/Singapore/24/2020          | 2020-03-04      | Wild type (this study)       |
| EPI_ISL_420102   | hCoV_19/Singapore/25/2020          | 2020-03-05      | Wild type (this study)       |
| EPI_ISL_420103   | hCoV_19/Singapore/26/2020          | 2020-03-05      | Wild type (this study)       |
| EPI_ISL_420104   | hCoV_19/Singapore/27/2020          | 2020-03-05      | Wild type (this study)       |
| EPI_ISL_420105   | hCoV_19/Singapore/28/2020          | 2020-03-06      | Wild type (this study)       |
| EPI_ISL_420106   | hCoV_19/Singapore/29/2020          | 2020-03-06      | Wild type (this study)       |
| EPI_ISL_420107   | hCoV-19/Singapore/30/2020          | 2020-03-09      | 382-nt deletion (this study) |
| EPI_ISL_420108   | hCoV-19/Singapore/31/2020          | 2020-03-10      | Wild type (this study)       |
| EPI_ISL_420109   | hCoV_19/Singapore/32/2020          | 2020-03-11      | Wild type (this study)       |
| EPI_ISL_420110   | hCoV_19/Singapore/33/2020          | 2020-03-11      | Wild type (this study)       |
| EPI_ISL_420111   | hCoV_19/Singapore/34/2020          | 2020-03-12      | Wild type (this study)       |
| EPI_ISL_402120   | hCoV-19/Wuhan/IVDC-HB-04/2020      | 2020-01-01      | Wild type                    |
| EPI_ISL_402123   | hCoV-19/Wuhan/IPBCAMS-WH-01/2019   | 2019-12-24      | Wild type                    |
| EPI_ISL_402125   | hCoV-19/Wuhan-Hu-1/2019            | 2019-12-31      | Wild type                    |
| EPI_ISL_403962   | hCoV-19/Thailand/61/2020           | 2020-01-08      | Wild type                    |
| EPI_ISL_404228   | hCoV-19/Zhejiang/WZ-02/2020        | 2020-01-17      | Wild type                    |
| EPI_ISL_404895   | hCoV-19/USA/WA1/2020               | 2020-01-19      | Wild type                    |
| EPI_ISL_406030   | hCoV-19/Shenzhen/HKU-SZ-002/2020   | 2020-01-10      | Wild type                    |
| EPI_ISL_406536   | hCoV-19/Foshan/20SF211/2020        | 2020-01-22      | Wild type                    |
| EPI_ISL_406538   | hCoV-19/Guangdong/20SF201/2020     | 2020-01-23      | Wild type                    |
| EPI_ISL_406593   | hCoV-19/Shenzhen/SZTH-002/2020     | 2020-01-13      | Wild type                    |
| EPI_ISL_406596   | hCoV-19/France/IDF0372/2020        | 2020-01-23      | Wild type                    |
| EPI_ISL_406717   | hCoV-19/Wuhan/WHU02/2020           | 2020-01-02      | Wild type                    |
| EPI_ISL_406798   | hCoV-19/Wuhan/WH01/2019            | 2019-12-26      | Wild type                    |
| EPI_ISL_406801   | hCoV-19/Wuhan/WH04/2020            | 2020-01-05      | Wild type                    |
| EPI_ISL_406844   | hCoV-19/Australia/VIC01/2020       | 2020-01-25      | Wild type                    |
| EPI_ISL_406862   | hCoV-19/Germany/BavPat1/2020       | 2020-01-28      | Wild type                    |
| EPI_ISL_406973   | hCoV_19/Singapore/1/2020           | 2020-01-23      | Wild type                    |
| EPI_ISL_407193   | hCoV-19/South_Korea/KCDC03/2020    | 2020-01-25      | Wild type                    |
| EPI_ISL_407215   | hCoV-19/USA/WA1-F6/2020            | 2020-01-25      | Wild type                    |
| EPI_ISL_407976   | hCoV-19/Belgium/GHB-03021/2020     | 2020-02-03      | Wild type                    |
| EPI_ISL_408008   | hCoV-19/USA/CA3/2020               | 2020-01-29      | Wild type                    |
| EPI_ISL_408431   | hCoV-19/France/IDF0626/2020        | 2020-01-29      | Wild type                    |
| EPI_ISL_408479   | hCoV-19/Chongqing/ZX01/2020        | 2020-01-23      | Wild type                    |
| EPI_ISL_408480   | hCoV-19/Yunnan/IVDC-YN-003/2020    | 2020-01-17      | Wild type                    |
| EPI_ISL_408481   | hCoV-19/Chongqing/IVDC-CQ-001/2020 | 2020-01-18      | Wild type                    |
| EPI_ISL_408484   | hCoV-19/Sichuan/IVDC-SC-001/2020   | 2020-01-15      | Wild type                    |
| EPI_ISL_408489   | hCoV-19/Taiwan/NTU01/2020          | 2020-01-31      | Wild type                    |
| EPI_ISL_408665   | hCoV-19/Japan/TY-WK-012/2020       | 2020-01-29      | Wild type                    |
| EPI_ISL_408666   | hCoV-19/Japan/TY-WK-501/2020       | 2020-01-31      | Wild type                    |
| EPI_ISL_408667   | hCoV-19/Japan/TY-WK-521/2020       | 2020-01-31      | Wild type                    |
| EPI_ISL_408668   | hCoV-19/Vietnam/VR03-38142/2020    | 2020-01-24      | Wild type                    |
| EPI_ISL_408669   | hCoV-19/Japan/KY-V-029/2020        | 2020-01-29      | Wild type                    |
| EPI_ISL_408670   | hCoV-19/USA/WI1/2020               | 2020-01-31      | Wild type                    |
| EPI_ISL_408976   | hCoV-19/Australia/NSW02/2020       | 2020-01-22      | Wild type                    |

|                |                                     |            |           |
|----------------|-------------------------------------|------------|-----------|
| EPI_ISL_409067 | hCoV-19/USA/MA1/2020                | 2020-01-29 | Wild type |
| EPI_ISL_410045 | hCoV-19/USA/IL2/2020                | 2020-01-28 | Wild type |
| EPI_ISL_410218 | hCoV-19/Taiwan/NTU02/2020           | 2020-02-05 | Wild type |
| EPI_ISL_410301 | hCoV-19/Nepal/61/2020               | 2020-01-13 | Wild type |
| EPI_ISL_410532 | hCoV-19/Japan/OS-20-07-1/2020       | 2020-01-23 | Wild type |
| EPI_ISL_410545 | hCoV-19/Italy/INMI1-isl/2020        | 2020-01-29 | Wild type |
| EPI_ISL_410546 | hCoV-19/Italy/INMI1-cs/2020         | 2020-01-31 | Wild type |
| EPI_ISL_410713 | hCoV_19/Singapore/7/2020            | 2020-01-27 | Wild type |
| EPI_ISL_410714 | hCoV_19/Singapore/8/2020            | 2020-02-03 | Wild type |
| EPI_ISL_410715 | hCoV_19/Singapore/9/2020            | 2020-02-04 | Wild type |
| EPI_ISL_410716 | hCoV_19/Singapore/10/2020           | 2020-02-04 | Wild type |
| EPI_ISL_410718 | hCoV-19/Australia/QLD04/2020        | 2020-02-05 | Wild type |
| EPI_ISL_410719 | hCoV_19/Singapore/11/2020           | 2020-02-02 | Wild type |
| EPI_ISL_410984 | hCoV-19/France/IDF0515-isl/2020     | 2020-01-29 | Wild type |
| EPI_ISL_411060 | hCoV-19/Fujian/8/2020               | 2020-01-21 | Wild type |
| EPI_ISL_411066 | hCoV-19/Fujian/13/2020              | 2020-01-22 | Wild type |
| EPI_ISL_411218 | hCoV-19/France/IDF0571/2020         | 2020-02-02 | Wild type |
| EPI_ISL_411219 | hCoV-19/France/IDF0386-islP1/2020   | 2020-01-28 | Wild type |
| EPI_ISL_411220 | hCoV-19/France/IDF0386-islP3/2020   | 2020-01-28 | Wild type |
| EPI_ISL_411902 | hCoV-19/Cambodia/0012/2020          | 2020-01-27 | Wild type |
| EPI_ISL_411915 | hCoV-19/Taiwan/CGMH-CGU-01/2020     | 2020-01-25 | Wild type |
| EPI_ISL_411927 | hCoV-19/Taiwan/4/2020               | 2020-01-28 | Wild type |
| EPI_ISL_411950 | hCoV-19/Jiangsu/JS01/2020           | 2020-01-23 | Wild type |
| EPI_ISL_411951 | hCoV-19/Sweden/01/2020              | 2020-02-07 | Wild type |
| EPI_ISL_411953 | hCoV-19/Jiangsu/JS03/2020           | 2020-01-24 | Wild type |
| EPI_ISL_411954 | hCoV-19/USA/CA7/2020                | 2020-02-06 | Wild type |
| EPI_ISL_411956 | hCoV-19/USA/TX1/2020                | 2020-02-11 | Wild type |
| EPI_ISL_412026 | hCoV-19/Hefei/2/2020                | 2020-02-23 | Wild type |
| EPI_ISL_412028 | hCoV-19/Hong_Kong/VM20001061/2020   | 2020-01-22 | Wild type |
| EPI_ISL_412029 | hCoV-19/Hong_Kong/VB20024950/2020   | 2020-01-30 | Wild type |
| EPI_ISL_412030 | hCoV-19/Hong_Kong/VB20026565/2020   | 2020-02-01 | Wild type |
| EPI_ISL_412116 | hCoV-19/England/09c/2020            | 2020-02-09 | Wild type |
| EPI_ISL_412862 | hCoV-19/USA/CA9/2020                | 2020-02-23 | Wild type |
| EPI_ISL_412869 | hCoV-19/South_Korea/KCDC05/2020     | 2020-01-30 | Wild type |
| EPI_ISL_412871 | hCoV-19/South_Korea/KCDC07/2020     | 2020-01-31 | Wild type |
| EPI_ISL_412872 | hCoV-19/South_Korea/KCDC12/2020     | 2020-02-01 | Wild type |
| EPI_ISL_412873 | hCoV-19/South_Korea/KCDC24/2020     | 2020-02-06 | Wild type |
| EPI_ISL_412899 | hCoV-19/Wuhan/HBCDC-HB-03/2019      | 2019-12-30 | Wild type |
| EPI_ISL_412966 | hCoV-19/China/IQTC01/2020           | 2020-02-05 | Wild type |
| EPI_ISL_412967 | hCoV-19/China/IQTC02/2020           | 2020-01-29 | Wild type |
| EPI_ISL_412968 | hCoV-19/Japan/Hu_DP_Kng_19-020/2020 | 2020-02-10 | Wild type |
| EPI_ISL_412970 | hCoV-19/USA/WA2/2020                | 2020-02-24 | Wild type |
| EPI_ISL_412971 | hCoV-19/Finland/FIN-25/2020         | 2020-02-25 | Wild type |
| EPI_ISL_412973 | hCoV-19/Italy/CDG1/2020             | 2020-02-20 | Wild type |
| EPI_ISL_412974 | hCoV-19/Italy/SPL1/2020             | 2020-01-29 | Wild type |
| EPI_ISL_412975 | hCoV-19/Australia/NSW05/2020        | 2020-02-28 | Wild type |
| EPI_ISL_412979 | hCoV-19/Wuhan/HBCDC-HB-03/2020      | 2020-01-18 | Wild type |
| EPI_ISL_412982 | hCoV-19/Wuhan/HBCDC-HB-06/2020      | 2020-02-07 | Wild type |
| EPI_ISL_413014 | hCoV-19/Canada/ON-PHL2445/2020      | 2020-01-25 | Wild type |
| EPI_ISL_413015 | hCoV-19/Canada/ON-VIDO-01/2020      | 2020-01-23 | Wild type |
| EPI_ISL_413016 | hCoV-19/Brazil/SPBR-02/2020         | 2020-02-28 | Wild type |
| EPI_ISL_413018 | hCoV-19/South_Korea/KUMC02/2020     | 2020-02-06 | Wild type |
| EPI_ISL_413020 | hCoV-19/Switzerland/1000477377/2020 | 2020-02-27 | Wild type |
| EPI_ISL_413025 | hCoV-19/USA/WA3-UW1/2020            | 2020-02-27 | Wild type |
| EPI_ISL_413214 | hCoV-19/Australia/NSW07/2020        | 2020-02-29 | Wild type |
| EPI_ISL_413456 | hCoV-19/USA/WA-S2/2020              | 2020-02-20 | Wild type |
| EPI_ISL_413458 | hCoV-19/USA/WA7-UW4/2020            | 2020-03-01 | Wild type |
| EPI_ISL_413459 | hCoV-19/Japan/TK-20-31-3/2020       | 2020-02-20 | Wild type |

|                |                                          |            |           |
|----------------|------------------------------------------|------------|-----------|
| EPI_ISL_413486 | hCoV-19/USA/WA8-UW5/2020                 | 2020-03-01 | Wild type |
| EPI_ISL_413488 | hCoV-19/Germany/NRW-01/2020              | 2020-02-28 | Wild type |
| EPI_ISL_413489 | hCoV-19/Italy/UniSR1/2020                | 2020-03-03 | Wild type |
| EPI_ISL_413521 | hCoV-19/Beijing/235/2020                 | 2020-01-28 | Wild type |
| EPI_ISL_413523 | hCoV-19/India/1-31/2020                  | 2020-01-31 | Wild type |
| EPI_ISL_413558 | hCoV-19/USA/CA-CDPH-UC2/2020             | 2020-02-27 | Wild type |
| EPI_ISL_413560 | hCoV-19/USA/WA-S3/2020                   | 2020-02-28 | Wild type |
| EPI_ISL_413563 | hCoV-19/USA/WA12-UW8/2020                | 2020-03-03 | Wild type |
| EPI_ISL_413572 | hCoV-19/Netherlands/Haarlem_1363688/2020 | 2020-03-01 | Wild type |
| EPI_ISL_413592 | hCoV-19/Taiwan/NTU03/2020                | 2020-03-02 | Wild type |
| EPI_ISL_413593 | hCoV-19/Luxembourg/Lux1/2020             | 2020-02-29 | Wild type |
| EPI_ISL_413594 | hCoV-19/Australia/NSW08/2020             | 2020-02-28 | Wild type |
| EPI_ISL_413598 | hCoV-19/Australia/NSW12/2020             | 2020-03-04 | Wild type |
| EPI_ISL_413602 | hCoV-19/Finland/FIN03032020A/2020        | 2020-03-03 | Wild type |
| EPI_ISL_413607 | hCoV-19/USA/CruiseA-2/2020               | 2020-02-18 | Wild type |
| EPI_ISL_413617 | hCoV-19/USA/CruiseA-12/2020              | 2020-02-20 | Wild type |
| EPI_ISL_413623 | hCoV-19/USA/CruiseA-18/2020              | 2020-02-24 | Wild type |
| EPI_ISL_413648 | hCoV-19/Portugal/CV63/2020               | 2020-03-01 | Wild type |
| EPI_ISL_413650 | hCoV-19/USA/WA15-UW11/2020               | 2020-03-05 | Wild type |
| EPI_ISL_413864 | hCoV-19/Guangdong/GD2020246-P0028/2020   | 2020-02-09 | Wild type |
| EPI_ISL_413931 | hCoV-19/USA/CA-CDPH-UC11/2020            | 2020-03-05 | Wild type |
| EPI_ISL_413996 | hCoV-19/Switzerland/TI9486/2020          | 2020-02-24 | Wild type |
| EPI_ISL_414011 | hCoV-19/England/200990006/2020           | 2020-02-26 | Wild type |
| EPI_ISL_414020 | hCoV-19/Switzerland/GE5373/2020          | 2020-02-27 | Wild type |
| EPI_ISL_414027 | hCoV-19/Scotland/CVR05/2020              | 2020-03-04 | Wild type |
| EPI_ISL_414044 | hCoV-19/England/200690756/2020           | 2020-02-08 | Wild type |
| EPI_ISL_414366 | hCoV-19/USA/WA-UW18/2020                 | 2020-03-05 | Wild type |
| EPI_ISL_414414 | hCoV-19/Australia/QLD09/2020             | 2020-02-29 | Wild type |
| EPI_ISL_414457 | hCoV-19/Netherlands/NoordBrabant_17/2020 | 2020-03-06 | Wild type |
| EPI_ISL_414479 | hCoV-19/USA/CruiseA-19/2020              | 2020-02-18 | Wild type |
| EPI_ISL_414485 | hCoV-19/USA/CruiseA-26/2020              | 2020-02-24 | Wild type |
| EPI_ISL_414499 | hCoV-19/Germany/NRW-04/2020              | 2020-02-26 | Wild type |
| EPI_ISL_414500 | hCoV-19/England/Sheff01/2020             | 2020-03-04 | Wild type |
| EPI_ISL_414509 | hCoV-19/Germany/NRW-09/2020              | 2020-02-28 | Wild type |
| EPI_ISL_414510 | hCoV-19/Shanghai/SH01/2020               | 2020-02-02 | Wild type |
| EPI_ISL_414520 | hCoV-19/Germany/BavPat2/2020             | 2020-03-02 | Wild type |
| EPI_ISL_414526 | hCoV-19/England/201040141/2020           | 2020-03-03 | Wild type |
| EPI_ISL_414527 | hCoV-19/Hong_Kong/VM20002493/2020        | 2020-02-09 | Wild type |
| EPI_ISL_414536 | hCoV-19/Netherlands/NoordBrabant_27/2020 | 2020-03-08 | Wild type |
| EPI_ISL_414564 | hCoV-19/Netherlands/ZuidHolland_22/2020  | 2020-03-08 | Wild type |
| EPI_ISL_414569 | hCoV-19/Hong_Kong/VM20002582/2020        | 2020-02-12 | Wild type |
| EPI_ISL_414577 | hCoV-19/Chile/Talca-1/2020               | 2020-03-02 | Wild type |
| EPI_ISL_414578 | hCoV-19/Chile/Talca-2/2020               | 2020-03-04 | Wild type |
| EPI_ISL_414580 | hCoV-19/Chile/Santiago-2/2020            | 2020-03-05 | Wild type |
| EPI_ISL_414586 | hCoV-19/Ireland/Limerick-19934/2020      | 2020-03-03 | Wild type |
| EPI_ISL_414590 | hCoV-19/USA/MN3-MDH3/2020                | 2020-03-09 | Wild type |
| EPI_ISL_414592 | hCoV-19/USA/WA-UW23/2020                 | 2020-03-06 | Wild type |
| EPI_ISL_414600 | hCoV-19/France/GE1583/2020               | 2020-02-26 | Wild type |
| EPI_ISL_414616 | hCoV-19/USA/WA-UW29/2020                 | 2020-03-08 | Wild type |
| EPI_ISL_414643 | hCoV-19/Finland/FIN-508/2020             | 2020-03-07 | Wild type |
| EPI_ISL_414648 | hCoV-19/USA/CA-PC101P/2020               | 2020-03-11 | Wild type |
| EPI_ISL_414687 | hCoV-19/Guangzhou/GZMU0031/2020          | 2020-02-25 | Wild type |
| EPI_ISL_414936 | hCoV-19/Shandong/LY003/2020              | 2020-01-23 | Wild type |
| EPI_ISL_414938 | hCoV-19/Shandong/LY005/2020              | 2020-01-24 | Wild type |
| EPI_ISL_414939 | hCoV-19/Shandong/LY006/2020              | 2020-01-25 | Wild type |
| EPI_ISL_414940 | hCoV-19/Shandong/LY007/2020              | 2020-01-25 | Wild type |
| EPI_ISL_414949 | hCoV-19/Northern_Ireland/HSCNI01/2020    | 2020-02-26 | Wild type |
| EPI_ISL_415470 | hCoV-19/Netherlands/NA_14/2020           | 2020-03-10 | Wild type |

|                |                                        |            |                 |
|----------------|----------------------------------------|------------|-----------------|
| EPI_ISL_415642 | hCoV-19/Georgia/Tb-477/2020            | 2020-03-10 | Wild type       |
| EPI_ISL_416031 | hCoV-19/Brazil/SPBR-09/2020            | 2020-03-04 | Wild type       |
| EPI_ISL_416316 | hCoV-19/Shanghai/SH0002/2020           | 2020-01-25 | Wild type       |
| EPI_ISL_416326 | hCoV-19/Shanghai/SH0013/2020           | 2020-01-30 | Wild type       |
| EPI_ISL_416342 | hCoV-19/Shanghai/SH0033/2020           | 2020-02-04 | Wild type       |
| EPI_ISL_416373 | hCoV-19/Shanghai/SH0070/2020           | 2020-02-07 | Wild type       |
| EPI_ISL_416405 | hCoV-19/Shanghai/SH0121/2020           | 2020-02-02 | Wild type       |
| EPI_ISL_416411 | hCoV-19/Australia/VIC03/2020           | 2020-01-25 | Wild type       |
| EPI_ISL_416426 | hCoV-19/Hungary/mbl1/2020              | 2020-03-17 | Wild type       |
| EPI_ISL_416457 | hCoV-19/USA/CA-MG0987/2020             | 2020-03-18 | Wild type       |
| EPI_ISL_416468 | hCoV-19/Belgium/GMH-03022/2020         | 2020-03-02 | Wild type       |
| EPI_ISL_416477 | hCoV-19/Georgia/Tb-390/2020            | 2020-03-08 | Wild type       |
| EPI_ISL_416497 | hCoV-19/France/HF2239/2020             | 2020-03-10 | Wild type       |
| EPI_ISL_416511 | hCoV-19/France/B2348/2020              | 2020-03-07 | Wild type       |
| EPI_ISL_416519 | hCoV-19/New_Zealand/20VR0189/2020      | 2020-03-02 | Wild type       |
| EPI_ISL_416525 | hCoV-19/Japan/SMU-0311S3/2020          | 2020-03-11 | Wild type       |
| EPI_ISL_416539 | hCoV-19/New_Zealand/20VR0276/2020      | 2020-03-15 | Wild type       |
| EPI_ISL_416543 | hCoV-19/Kuwait/KU18/2020               | 2020-03-02 | Wild type       |
| EPI_ISL_416566 | hCoV-19/Japan/DP0027/2020              | 2020-02-15 | Wild type       |
| EPI_ISL_416578 | hCoV-19/Japan/DP0152/2020              | 2020-02-15 | Wild type       |
| EPI_ISL_416597 | hCoV-19/Japan/DP0346/2020              | 2020-02-16 | Wild type       |
| EPI_ISL_416635 | hCoV-19/USA/WA-UW97/2020               | 2020-03-12 | Wild type       |
| EPI_ISL_416649 | hCoV-19/USA/WA-UW111/2020              | 2020-03-11 | Wild type       |
| EPI_ISL_416674 | hCoV-19/USA/WA-UW136/2020              | 2020-03-11 | Wild type       |
| EPI_ISL_416689 | hCoV-19/USA/WA-UW151/2020              | 2020-03-14 | Wild type       |
| EPI_ISL_416700 | hCoV-19/USA/WA-UW162/2020              | 2020-03-13 | Wild type       |
| EPI_ISL_416734 | hCoV-19/England/SHEF-BFCFD/2020        | 2020-03-09 | Wild type       |
| EPI_ISL_416750 | hCoV-19/France/Lyon_683/2020           | 2020-03-06 | Wild type       |
| EPI_ISL_416756 | hCoV-19/France/Lyon_06531/2020         | 2020-03-06 | Wild type       |
| EPI_ISL_417017 | hCoV-19/Belgium/ULG-6638/2020          | 2020-03-14 | Wild type       |
| EPI_ISL_417018 | hCoV-19/Belgium/ULG-6670/2020          | 2020-03-14 | Wild type       |
| EPI_ISL_417033 | hCoV-19/Australia/QLDID921/2020        | 2020-03-11 | Wild type       |
| EPI_ISL_417064 | hCoV-19/Hong_Kong/VB20017970/2020      | 2020-01-21 | Wild type       |
| EPI_ISL_417181 | hCoV-19/Hong_Kong/HKPU19_0402/2020     | 2020-02-05 | Wild type       |
| EPI_ISL_417404 | hCoV-19/Australia/NSW50/2020           | 2020-03-12 | Wild type       |
| EPI_ISL_417518 | hCoV-19/Taiwan/CGMH-CGU-02/2020        | 2020-02-04 | 382-nt deletion |
| EPI_ISL_417696 | hCoV-19/Iceland/135/2020               | 2020-03-12 | Wild type       |
| EPI_ISL_417739 | hCoV-19/Iceland/5/2020                 | 2020-03-13 | Wild type       |
| EPI_ISL_417878 | hCoV-19/Slovakia/SK-BMC2/2020          | 2020-03-07 | Wild type       |
| EPI_ISL_417961 | hCoV-19/Spain/Madrid_H9_38/2020        | 2020-03-12 | Wild type       |
| EPI_ISL_417989 | hCoV-19/Portugal/PT0005/2020           | 2020-03-04 | Wild type       |
| EPI_ISL_418026 | hCoV-19/Portugal/PT0041/2020           | 2020-03-17 | Wild type       |
| EPI_ISL_418213 | hCoV-19/Senegal/094/2020               | 2020-03-12 | Wild type       |
| EPI_ISL_418247 | hCoV-19/Spain/CastillayLeon201061/2020 | 2020-02-26 | Wild type       |
| EPI_ISL_418256 | hCoV-19/Italy/TE4880/2020              | 2020-03-14 | Wild type       |
| EPI_ISL_418267 | hCoV-19/Vietnam/19-02S/2020            | 2020-01-22 | Wild type       |
| EPI_ISL_418345 | hCoV-19/Canada/ON_PHL8751/2020         | 2020-02-29 | Wild type       |
| EPI_ISL_418391 | hCoV-19/Finland/13M57/2020             | 2020-03-13 | Wild type       |
| EPI_ISL_418511 | hCoV-19/Hangzhou/HZ477/2020            | 2020-01-24 | Wild type       |
| EPI_ISL_418632 | hCoV-19/Belgium/ULG-7500/2020          | 2020-03-16 | Wild type       |
| EPI_ISL_418809 | hCoV-19/Japan/UT-NCGM02/2020           | 2020-02-01 | Wild type       |
| EPI_ISL_418849 | hCoV-19/Canada/BC_8486790/2020         | 2020-03-13 | Wild type       |
| EPI_ISL_418987 | hCoV-19/Belgium/CG-030158/2020         | 2020-03-01 | Wild type       |
| EPI_ISL_418993 | hCoV-19/Singapore/20/2020              | 2020-01-29 | Wild type       |
| EPI_ISL_418996 | hCoV-19/Singapore/15/2020              | 2020-01-27 | 382-nt deletion |
| EPI_ISL_418997 | hCoV-19/Singapore/16/2020              | 2020-02-06 | 382-nt deletion |
| EPI_ISL_418999 | hCoV-19/Singapore/18/2020              | 2020-03-01 | 382-nt deletion |
| EPI_ISL_419000 | hCoV-19/Singapore/21/2020              | 2020-02-13 | 382-nt deletion |

|                |                                     |            |                 |
|----------------|-------------------------------------|------------|-----------------|
| EPI_ISL_419001 | hCoV-19/Singapore/19/2020           | 2020-03-02 | 382-nt deletion |
| EPI_ISL_419211 | hCoV-19/Israel/ISR_JP0320/2020      | 2020-02-23 | Wild type       |
| EPI_ISL_419655 | hCoV-19/Austria/CeMM0002/2020       | 2020-02-26 | Wild type       |
| EPI_ISL_419734 | hCoV-19/Australia/VIC14/2020        | 2020-02-02 | Wild type       |
| EPI_ISL_419951 | hCoV-19/Australia/VIC258/2020       | 2020-03-21 | Wild type       |
| EPI_ISL_420037 | hCoV-19/Algeria/G0860_2262/2020     | 2020-03-02 | Wild type       |
| EPI_ISL_420059 | hCoV-19/France/IDF3165/2020         | 2020-03-21 | Wild type       |
| EPI_ISL_420134 | hCoV-19/Norway/1495/2020            | 2020-02-28 | Wild type       |
| EPI_ISL_420152 | hCoV-19/Norway/2088/2020            | 2020-03-17 | Wild type       |
| EPI_ISL_420428 | hCoV-19/Belgium/VM-0325171/2020     | 2020-03-25 | Wild type       |
| EPI_ISL_420455 | hCoV-19/Hong_Kong/HKPU102_2802/2020 | 2020-03-04 | Wild type       |
| EPI_ISL_420636 | hCoV-19/England/20136085404/2020    | 2020-03-24 | Wild type       |
| EPI_ISL_420854 | hCoV-19/DRC/521/2020                | 2020-03-25 | Wild type       |
| EPI_ISL_421221 | hCoV-19/Hangzhou/HZCDC6789/2020     | 2020-03-15 | Wild type       |
| EPI_ISL_421238 | hCoV-19/Nanchang/JX1174/2020        | 2020-01-29 | Wild type       |
| EPI_ISL_421239 | hCoV-19/Shangrao/JX105/2020         | 2020-01-26 | Wild type       |
| EPI_ISL_421246 | hCoV-19/Nanchang/JXN3T4/2020        | 2020-02-26 | Wild type       |
| EPI_ISL_421251 | hCoV-19/Shangrao/JX1176/2020        | 2020-02-03 | Wild type       |
| EPI_ISL_421260 | hCoV-19/Xinyu/JX124/2020            | 2020-01-26 | Wild type       |
| EPI_ISL_421653 | hCoV-19/Latvia/01/2020              | 2020-03-25 | Wild type       |
| EPI_ISL_421737 | hCoV-19/Luxembourg/LNS2334563/2020  | 2020-03-17 | Wild type       |
| EPI_ISL_421968 | hCoV-19/England/20146005304/2020    | 2020-04-01 | Wild type       |
| EPI_ISL_422055 | hCoV-19/Wales/PHWC-25E47/2020       | 2020-03-25 | Wild type       |
| EPI_ISL_422427 | hCoV-19/Kuwait/KU008/2020           | 2020-03-16 | Wild type       |
| EPI_ISL_422615 | hCoV-19/Netherlands/NA_306/2020     | 2020-04-01 | Wild type       |
| EPI_ISL_423250 | hCoV-19/England/201360220/2020      | 2020-03-25 | Wild type       |
| EPI_ISL_423251 | hCoV-19/England/201360221/2020      | 2020-03-25 | Wild type       |
| EPI_ISL_424580 | hCoV-19/Iceland/560/2020            | 2020-03-27 | Wild type       |
| EPI_ISL_424581 | hCoV-19/Iceland/561/2020            | 2020-03-28 | Wild type       |
| EPI_ISL_424582 | hCoV-19/Iceland/562/2020            | 2020-03-27 | Wild type       |
| EPI_ISL_424583 | hCoV-19/Iceland/563/2020            | 2020-03-28 | Wild type       |
| EPI_ISL_424609 | hCoV-19/Iceland/589/2020            | 2020-03-29 | Wild type       |
| EPI_ISL_424658 | hCoV-19/Belgium/ULG-10049/2020      | 2020-04-05 | Wild type       |
| EPI_ISL_424667 | hCoV-19/Mexico/EdoMex-IndRE_03/2020 | 2020-03-04 | Wild type       |
| EPI_ISL_425118 | hCoV-19/Korea/KCDC2002/2020         | 2020-01-30 | Wild type       |
| EPI_ISL_425199 | hCoV-19/Spain/Valencia75/2020       | 2020-03-19 | Wild type       |
| EPI_ISL_425794 | hCoV-19/Scotland/CVR635/2020        | 2020-03-25 | Wild type       |
| EPI_ISL_426166 | hCoV-19/Korea/KCDC2005/2020         | 2020-02-04 | Wild type       |
| EPI_ISL_426173 | hCoV-19/Korea/KCDC2009/2020         | 2020-02-07 | Wild type       |
| EPI_ISL_426179 | hCoV-19/India/c31/2020              | 2020-03-02 | Wild type       |
| EPI_ISL_426414 | hCoV-19/India/GBRC1/2020            | 2020-04-05 | Wild type       |
| EPI_ISL_426714 | hCoV-19/Australia/VIC414/2020       | 2020-03-26 | Wild type       |
| EPI_ISL_426780 | hCoV-19/Australia/VIC510/2020       | 2020-03-23 | Wild type       |
| EPI_ISL_426895 | hCoV-19/Czech_Republic/IAB_21/2020  | 2020-03-27 | Wild type       |
| EPI_ISL_426967 | hCoV-19/Australia/VIC671/2020       | 2020-03-27 | 138-nt deletion |
| EPI_ISL_427052 | hCoV-19/Australia/VIC777/2020       | 2020-03-30 | 138-nt deletion |
| EPI_ISL_427085 | hCoV-19/Australia/VIC812/2020       | 2020-04-02 | Wild type       |
| EPI_ISL_427116 | hCoV-19/Australia/VIC857/2020       | 2020-04-05 | Wild type       |
| EPI_ISL_427305 | hCoV-19/Brazil/SC-766/2020          | 2020-03-10 | Wild type       |
| EPI_ISL_427391 | hCoV-19/Turkey/GLAB-CoV008/2020     | 2020-04-13 | Wild type       |
| EPI_ISL_427394 | hCoV-19/Taiwan/TSGH-07/2020         | 2020-03-22 | Wild type       |
| EPI_ISL_427408 | hCoV-19/Qatar/QA13/2020             | 2020-03-23 | Wild type       |
| EPI_ISL_427427 | hCoV-19/USA/WI-UW-120/2020          | 2020-04-13 | Wild type       |
| EPI_ISL_427428 | hCoV-19/USA/WI-UW-121/2020          | 2020-04-11 | Wild type       |
| EPI_ISL_427430 | hCoV-19/USA/WI-UW-123/2020          | 2020-04-11 | Wild type       |
| EPI_ISL_427439 | hCoV-19/USA/WI-UW-132/2020          | 2020-04-10 | Wild type       |
| EPI_ISL_427445 | hCoV-19/USA/WI-UW-138/2020          | 2020-04-12 | Wild type       |
| EPI_ISL_427449 | hCoV-19/USA/WI-UW-142/2020          | 2020-04-10 | Wild type       |

|                |                                         |            |                 |
|----------------|-----------------------------------------|------------|-----------------|
| EPI_ISL_427452 | hCoV-19/USA/WI-UW-145/2020              | 2020-04-10 | Wild type       |
| EPI_ISL_427460 | hCoV-19/USA/WI-UW-153/2020              | 2020-04-09 | Wild type       |
| EPI_ISL_427461 | hCoV-19/USA/WI-UW-154/2020              | 2020-04-12 | Wild type       |
| EPI_ISL_428234 | hCoV-19/Poland/1105973/2020             | 2020-03-19 | Wild type       |
| EPI_ISL_428267 | hCoV-19/USA/WI-UW-171/2020              | 2020-03-19 | Wild type       |
| EPI_ISL_428348 | hCoV-19/France/GE3372/2020              | 2020-03-20 | Wild type       |
| EPI_ISL_428398 | hCoV-19/USA/CT-Yale-095/2020            | 2020-04-08 | Wild type       |
| EPI_ISL_428488 | hCoV-19/Taiwan/8/2020                   | 2020-01-31 | Wild type       |
| EPI_ISL_428676 | hCoV-19/Spain/Madrid_LP19_4952/2020     | 2020-03-07 | Wild type       |
| EPI_ISL_428822 | hCoV-19/Singapore/43/2020               | 2020-02-16 | 382-nt deletion |
| EPI_ISL_428830 | hCoV-19/Singapore/51/2020               | 2020-02-27 | 382-nt deletion |
| EPI_ISL_428857 | hCoV-19/Gambia/GC19-029/2020            | 2020-04-20 | Wild type       |
| EPI_ISL_428885 | hCoV-19/Russia/Samara-73406/2020        | 2020-03-20 | Wild type       |
| EPI_ISL_428916 | hCoV-19/Russia/Chechenya-83803/2020     | 2020-03-26 | Wild type       |
| EPI_ISL_428928 | hCoV-19/Poland/PL_P5/2020               | 2020-03-30 | Wild type       |
| EPI_ISL_428960 | hCoV-19/Luxembourg/LNS6326231/2020      | 2020-04-02 | Wild type       |
| EPI_ISL_429098 | hCoV-19/Guangzhou/GZMU0054/2020         | 2020-01-29 | Wild type       |
| EPI_ISL_429105 | hCoV-19/Guangzhou/GZMU0055/2020         | 2020-01-29 | Wild type       |
| EPI_ISL_429179 | hCoV-19/Thailand/Bangkok-0043/2020      | 2020-03-28 | Wild type       |
| EPI_ISL_429210 | hCoV-19/Switzerland/GE8147/2020         | 2020-03-16 | Wild type       |
| EPI_ISL_429220 | hCoV-19/Switzerland/GE6065/2020         | 2020-04-06 | Wild type       |
| EPI_ISL_429681 | hCoV-19/Brazil/CV21/2020                | 2020-03-16 | Wild type       |
| EPI_ISL_429722 | hCoV-19/Luxembourg/LNS6137379/2020      | 2020-04-01 | Wild type       |
| EPI_ISL_429852 | hCoV-19/Lishui/LS111/2020               | 2020-01-25 | Wild type       |
| EPI_ISL_429854 | hCoV-19/Lishui/LS557/2020               | 2020-02-01 | Wild type       |
| EPI_ISL_429861 | hCoV-19/Turkey/HSGM-8968/2020           | 2020-03-22 | Wild type       |
| EPI_ISL_429968 | hCoV-19/France/HF1463/2020              | 2020-02-21 | Wild type       |
| EPI_ISL_429997 | hCoV-19/Jordan/SR-037/2020              | 2020-03-16 | Wild type       |
| EPI_ISL_430440 | hCoV-19/Malaysia/IMR_WC1170/2020        | 2020-03-05 | Wild type       |
| EPI_ISL_430441 | hCoV-19/Malaysia/IMR_WC1097/2020        | 2020-02-29 | Wild type       |
| EPI_ISL_430443 | hCoV-19/Malaysia/IMR_WC085/2020         | 2020-01-28 | Wild type       |
| EPI_ISL_430576 | hCoV-19/Australia/VIC1114/2020          | 2020-04-07 | Wild type       |
| EPI_ISL_430741 | hCoV-19/Beijing/BJ782/2020              | 2020-02-10 | Wild type       |
| EPI_ISL_430742 | hCoV-19/Beijing/BJ251/2020              | 2020-01-29 | Wild type       |
| EPI_ISL_430799 | hCoV-19/Argentina/PAIS_A007/2020        | 2020-03-30 | Wild type       |
| EPI_ISL_430801 | hCoV-19/Argentina/PAIS_A009/2020        | 2020-03-31 | Wild type       |
| EPI_ISL_430803 | hCoV-19/Argentina/PAIS_A012/2020        | 2020-04-01 | Wild type       |
| EPI_ISL_430804 | hCoV-19/Argentina/PAIS_A013/2020        | 2020-04-01 | Wild type       |
| EPI_ISL_430816 | hCoV-19/Argentina/PAIS_A025/2020        | 2020-04-18 | Wild type       |
| EPI_ISL_430817 | hCoV-19/Argentina/PAIS_A026/2020        | 2020-04-18 | Wild type       |
| EPI_ISL_431782 | hCoV-19/Fujian/IM3520014T/2020          | 2020-03-22 | Wild type       |
| EPI_ISL_431975 | hCoV-19/Wales/PHWC-275AA/2020           | 2020-03-31 | Wild type       |
| EPI_ISL_432624 | hCoV-19/England/SHEF-D10F9/2020         | 2020-03-24 | Wild type       |
| EPI_ISL_433446 | hCoV-19/Scotland/EDB1433/2020           | 2020-04-12 | Wild type       |
| EPI_ISL_433631 | hCoV-19/Scotland/CVR1613/2020           | 2020-04-05 | Wild type       |
| EPI_ISL_434535 | hCoV-19/Costa_Rica/02/2020              | 2020-03-16 | Wild type       |
| EPI_ISL_434545 | hCoV-19/Puerto_Rico/CDC-S5/2020         | 2020-03-23 | Wild type       |
| EPI_ISL_434572 | hCoV-19/Czech_Republic/2308/2020        | 2020-04-14 | Wild type       |
| EPI_ISL_434669 | hCoV-19/Sweden/20-07390/2020            | 2020-04-15 | Wild type       |
| EPI_ISL_435032 | hCoV-19/DRC/1516/2020                   | 2020-04-09 | Wild type       |
| EPI_ISL_435047 | hCoV-19/Kazakhstan/NCB-3/2020           | 2020-03-25 | Wild type       |
| EPI_ISL_435123 | hCoV-19/United_Arab_Emirates/L0484/2020 | 2020-03-12 | Wild type       |
| EPI_ISL_435134 | hCoV-19/United_Arab_Emirates/L4280/2020 | 2020-02-08 | Wild type       |
| EPI_ISL_435137 | hCoV-19/United_Arab_Emirates/L5630/2020 | 2020-01-29 | Wild type       |
| EPI_ISL_435316 | hCoV-19/Vietnam/OUCRU0985/2020          | 2020-03-17 | Wild type       |
| EPI_ISL_435403 | hCoV-19/Hungary/SRC-00066/2020          | 2020-03-20 | Wild type       |
| EPI_ISL_435694 | hCoV-19/Singapore/89/2020               | 2020-04-22 | Wild type       |
| EPI_ISL_436226 | hCoV-19/Spain/Valencia131/2020          | 2020-03-17 | Wild type       |

|                |                                                 |            |           |
|----------------|-------------------------------------------------|------------|-----------|
| EPI_ISL_436330 | hCoV-19/Spain/Valencia235/2020                  | 2020-03-26 | Wild type |
| EPI_ISL_436732 | hCoV-19/Italy/TE26425/2020                      | 2020-04-27 | Wild type |
| EPI_ISL_437187 | hCoV-19/Indonesia/EJ-ITD853Sp/2020              | 2020-03-25 | Wild type |
| EPI_ISL_437192 | hCoV-19/Indonesia/JKT-EIJK04/2020               | 2020-04-01 | Wild type |
| EPI_ISL_437221 | hCoV-19/Germany/BAV-MVP0021/2020                | 2020-04-06 | Wild type |
| EPI_ISL_437237 | hCoV-19/Germany/BAV-MVP0038/2020                | 2020-03-23 | Wild type |
| EPI_ISL_437300 | hCoV-19/Austria/Graz-MUG11/2020                 | 2020-04-14 | Wild type |
| EPI_ISL_437322 | hCoV-19/Turkey/HSGM-1009/2020                   | 2020-03-19 | Wild type |
| EPI_ISL_437626 | hCoV-19/India/GMC-KP1125/2020                   | 2020-03-24 | Wild type |
| EPI_ISL_437643 | hCoV-19/Denmark/ALAB-SSI-1334/2020              | 2020-04-02 | Wild type |
| EPI_ISL_437708 | hCoV-19/Saudi_Arabia/KAUST-Makkah193/2020       | 2020-04-14 | Wild type |
| EPI_ISL_437714 | hCoV-19/Saudi_Arabia/KAUST-Makkah204/2020       | 2020-04-14 | Wild type |
| EPI_ISL_437717 | hCoV-19/Saudi_Arabia/KAUST-Madinah213/2020      | 2020-04-14 | Wild type |
| EPI_ISL_437720 | hCoV-19/Saudi_Arabia/KAUST-Makkah218/2020       | 2020-04-16 | Wild type |
| EPI_ISL_437887 | hCoV-19/Greece/220_35357/2020                   | 2020-03-18 | Wild type |
| EPI_ISL_437941 | hCoV-19/Austria/CeMM0071/2020                   | 2020-03-11 | Wild type |
| EPI_ISL_438766 | hCoV-19/Scotland/CVR1113/2020                   | 2020-03-29 | Wild type |
| EPI_ISL_438971 | hCoV-19/Japan/Donner27/2020                     | 2020-04-24 | Wild type |
| EPI_ISL_441401 | hCoV-19/Northern_Ireland/NIRE-102304/2020       | 2020-03-23 | Wild type |
| EPI_ISL_441698 | hCoV-19/Northern_Ireland/NIRE-FA968/2020        | 2020-04-06 | Wild type |
| EPI_ISL_442523 | hCoV-19/Iran/KHGRC-1.1-IPI-8206/2020            | 2020-03-09 | Wild type |
| EPI_ISL_443168 | hCoV-19/Saudi_Arabia/KAUST-Madinah24/2020       | 2020-03-29 | Wild type |
| EPI_ISL_443286 | hCoV-19/France/IDF5657/2020                     | 2020-04-02 | Wild type |
| EPI_ISL_444025 | hCoV-19/USA/CA-CZB-1091/2020                    | 2020-05-01 | Wild type |
| EPI_ISL_444471 | hCoV-19/India/GBRC40/2020                       | 2020-04-29 | Wild type |
| EPI_ISL_444495 | hCoV-19/Canada/QC_AA3/2020                      | 2020-04-05 | Wild type |
| EPI_ISL_444905 | hCoV-19/Denmark/ALAB-SSI-787/2020               | 2020-03-30 | Wild type |
| EPI_ISL_444972 | hCoV-19/Spain/Barcelona_VH6819/2020             | 2020-04-05 | Wild type |
| EPI_ISL_445000 | hCoV-19/Guam/GU_NHG_03/2020                     | 2020-03-20 | Wild type |
| EPI_ISL_445075 | hCoV-19/Luxembourg/LNS1586475/2020              | 2020-05-08 | Wild type |
| EPI_ISL_445244 | hCoV-19/Bangladesh/Akbiomed_01/2020             | 2020-04-25 | Wild type |
| EPI_ISL_445309 | hCoV-19/Chile/Santiago_30/2020                  | 2020-03-16 | Wild type |
| EPI_ISL_445351 | hCoV-19/Chile/Santiago_55/2020                  | 2020-04-02 | Wild type |
| EPI_ISL_445954 | hCoV-19/Wales/PHWC-2CB67/2020                   | 2020-04-01 | Wild type |
| EPI_ISL_447018 | hCoV-19/Thailand/Bangkok-0077/2020              | 2020-04-01 | Wild type |
| EPI_ISL_447033 | hCoV-19/India/GBRC58/2020                       | 2020-05-03 | Wild type |
| EPI_ISL_447043 | hCoV-19/India/GBRC67a/2020                      | 2020-05-03 | Wild type |
| EPI_ISL_447054 | hCoV-19/Romania/279068/2020                     | 2020-04-30 | Wild type |
| EPI_ISL_447056 | hCoV-19/Georgia/Tb-6572/2020                    | 2020-04-29 | Wild type |
| EPI_ISL_447123 | hCoV-19/Belgium/ULG-9535/2020                   | 2020-03-21 | Wild type |
| EPI_ISL_447153 | hCoV-19/Belgium/ULG-10158/2020                  | 2020-04-18 | Wild type |
| EPI_ISL_447262 | hCoV-19/Israel/990333068/2020                   | 2020-03-24 | Wild type |
| EPI_ISL_447334 | hCoV-19/Israel/2115990/2020                     | 2020-04-16 | Wild type |
| EPI_ISL_447524 | hCoV-19/Spain/Valencia605/2020                  | 2020-04-01 | Wild type |
| EPI_ISL_447536 | hCoV-19/India/GBRC78a/2020                      | 2020-05-05 | Wild type |
| EPI_ISL_447551 | hCoV-19/India/GBRC89/2020                       | 2020-04-25 | Wild type |
| EPI_ISL_447621 | hCoV-19/Taiwan/NTU27/2020                       | 2020-04-13 | Wild type |
| EPI_ISL_447734 | hCoV-19/Colombia/GUR-0072/2020                  | 2020-03-26 | Wild type |
| EPI_ISL_447759 | hCoV-19/Colombia/GUV-92061/2020                 | 2020-03-31 | Wild type |
| EPI_ISL_447786 | hCoV-19/Colombia/GVI-93534/2020                 | 2020-04-03 | Wild type |
| EPI_ISL_448001 | hCoV-19/England/CAMB-1AD72D/2020                | 2020-05-01 | Wild type |
| EPI_ISL_448357 | hCoV-19/England/NORW-E9C54/2020                 | 2020-04-30 | Wild type |
| EPI_ISL_448928 | hCoV-19/Northern_Ireland/NIRE-FAE4B/2020        | 2020-03-26 | Wild type |
| EPI_ISL_449321 | hCoV-19/Scotland/EDB4682/2020                   | 2020-05-09 | Wild type |
| EPI_ISL_450188 | hCoV-19/Jordan/SR-0336/2020                     | 2020-04-06 | Wild type |
| EPI_ISL_450209 | hCoV-19/Germany/BavPat2-ChVir984-ChVir1017/2020 | 2020-01-30 | Wild type |
| EPI_ISL_450254 | hCoV-19/Russia/StPetersburg-RII7501S/2020       | 2020-04-20 | Wild type |
| EPI_ISL_450294 | hCoV-19/Poland/IHG_PAS_1_69/2020                | 2020-04-11 | Wild type |

|                |                                            |            |                 |
|----------------|--------------------------------------------|------------|-----------------|
| EPI_ISL_450299 | hCoV-19/South_Africa/R07552/2020           | 2020-03-31 | Wild type       |
| EPI_ISL_450301 | hCoV-19/South_Africa/R07719/2020           | 2020-04-01 | Wild type       |
| EPI_ISL_450339 | hCoV-19/Bangladesh/BARJ_CVASU_CTG_501/2020 | 2020-05-10 | Wild type       |
| EPI_ISL_450343 | hCoV-19/Bangladesh/BARJ_CVASU_CTG_511/2020 | 2020-05-09 | 345-nt deletion |
| EPI_ISL_450344 | hCoV-19/Bangladesh/BARJ_CVASU_CTG_517/2020 | 2020-05-03 | 345-nt deletion |
| EPI_ISL_450509 | hCoV-19/Lebanon/S2_759/2020                | 2020-03-15 | Wild type       |
| EPI_ISL_450522 | hCoV-19/Latvia/022/2020                    | 2020-04-28 | Wild type       |
| EPI_ISL_450526 | hCoV-19/Poland/1109500/2020                | 2020-03-29 | Wild type       |
| EPI_ISL_450799 | hCoV-19/JAM/JM-CDC-7286/2020               | 2020-03-17 | Wild type       |
| EPI_ISL_450808 | hCoV-19/Sweden/20-06665/2020               | 2020-03-31 | Wild type       |
| EPI_ISL_450832 | hCoV-19/Sweden/20-51167/2020               | 2020-05-04 | Wild type       |
| EPI_ISL_451076 | hCoV-19/Sichuan/SC-WCH2-006/2020           | 2020-02-08 | Wild type       |
| EPI_ISL_451155 | hCoV-19/India/GBRC110/2020                 | 2020-05-03 | Wild type       |
| EPI_ISL_451162 | hCoV-19/India/GBRC117/2020                 | 2020-05-03 | Wild type       |
| EPI_ISL_452497 | hCoV-19/Spain/COV001404/2020               | 2020-03-19 | 62-nt deletion  |
| EPI_ISL_452530 | hCoV-19/Spain/COV001371/2020               | 2020-03-13 | 62-nt deletion  |

---
